# Supplementary material for: Mobile On-Road Measurements of Aerosol Optical Properties during MOABAI Campaign in the North China Plain
Source: MDPI journal article supplement (doi:10.3390/atmos13010021), 2021-12-24
Supplement: s1 [file s1]

Archive with 1 entries (1 files):
- atmosphere-1514028-supplementary.pdf
